# Supplementary material for: Dietary β-Carotene Rescues Vitamin A Deficiency and Inhibits Atherogenesis in Apolipoprotein E-Deficient Mice
Source: MDPI journal article supplement (doi:10.3390/nu12061625), 2020-06-01
Supplement: s1 [file s1]

**Supplementary Table 1.** Tissue distribution of VA and total BC.

| Parameters                          | Experimental Groups      |                          |                              |                             |
|-------------------------------------|--------------------------|--------------------------|------------------------------|-----------------------------|
|                                     | VAD                      | VA                       | BC                           | BC+VA                       |
| Plasma total BC ng/ml               | 0.032±0.007 <sup>a</sup> | 0.029±0.010 <sup>a</sup> | 0.126±0.019 <sup>b</sup>     | 0.100±0.02 <sup>ab</sup>    |
| Percent plasma 9-cis BC of total BC | 22.3±1.0                 | 21.8±1.7                 | 24.1 ± 1.0                   | 25.9.0±1.0                  |
| Liver total BC ng/g                 | 17.6±6.1 <sup>a</sup>    | 27.0±17.1 <sup>a</sup>   | 1,018.0 ± 120.0 <sup>b</sup> | 1,162 .0±335.0 <sup>b</sup> |
| Percent liver 9-cis BC of total BC  | 21.6±8.3                 | ND                       | 40.7±7.7                     | 45.5±3.1                    |
| Liver VA ug/g                       | 15.0 ±2.2 <sup>a</sup>   | 110.1±13.1 <sup>b</sup>  | 109.4±25.6 <sup>b</sup>      | 233±30.0 <sup>c</sup>       |
| Adipose tissue total BC ng/g        | 75±19.5 <sup>a</sup>     | 106±25 <sup>a</sup>      | 384±113 <sup>b</sup>         | 51±10.3 <sup>a</sup>        |
| Adipose tissue 9-cis BC of total BC | 34.0±6.4                 | 29.0±5.6                 | 38.8±1.7                     | 18.0±0.6*                   |
| Adipose tissue VA ng/g              | 62.0±9.2 <sup>a</sup>    | 89.2±14.2 <sup>a</sup>   | 161.1±28.1 <sup>ab</sup>     | 250.0±69.2 <sup>b</sup>     |
| Brain total BC ng/g                 | 9.6±4.5 <sup>a</sup>     | 10.2±3.0 <sup>a</sup>    | 20.0± 8.2 <sup>a</sup>       | 18.6 ±2.6 <sup>a</sup>      |
| Percent brain 9-cis BC of total BC  | ND                       | 11.3±3.9                 | 17.9±3.7                     | 17.3±2.9                    |
| Brain VA ng/g                       | ND <sup>a</sup>          | 3.5±1.2 <sup>b</sup>     | 4.0±1 <sup>b</sup>           | 4.1±1 <sup>b</sup>          |
| Renal total BC ng/g                 | 38.0±14.9 <sup>ab</sup>  | 20.3±3.1 <sup>a</sup>    | 256.1±59 <sup>c</sup>        | 157.5±22 <sup>bc</sup>      |
| Percent Renal 9-cis BC of total BC  | 11.7±4.2                 | 22.7±5.8                 | 37.7±2.2                     | 29.6±2.4*                   |
| Renal VA ng/g                       | 29.0±6.5 <sup>a</sup>    | 58.6±11.3 <sup>a</sup>   | 51.1±8.4 <sup>a</sup>        | 51.4±10.7 <sup>a</sup>      |

BC, percent BC of total BC and VA in plasma and tissues. Mean values within a row (a–c) not sharing a common superscript were significantly different by one way ANOVA and Tukey post hoc or Kruskal Wellis test comparison p<0.05). t-test was used to test the difference between 9-cis BC percent in BC group compared to BC+A group (p<0.05). \* significantly different by t-test (BC vs BC + Vit A, p<0.05), \* Total BC is the sum of 9-cis and all-trans BC. VAD = Vitamin A deficient , VA = vitamin A, BC= β-carotene, ND=not detected.
